# Supplementary material
Source: MDPI journal article supplement (https://www.mdpi.com/2304-6767/11/6/151)
Supplement: s1 [file s1]

Supplementary material 1

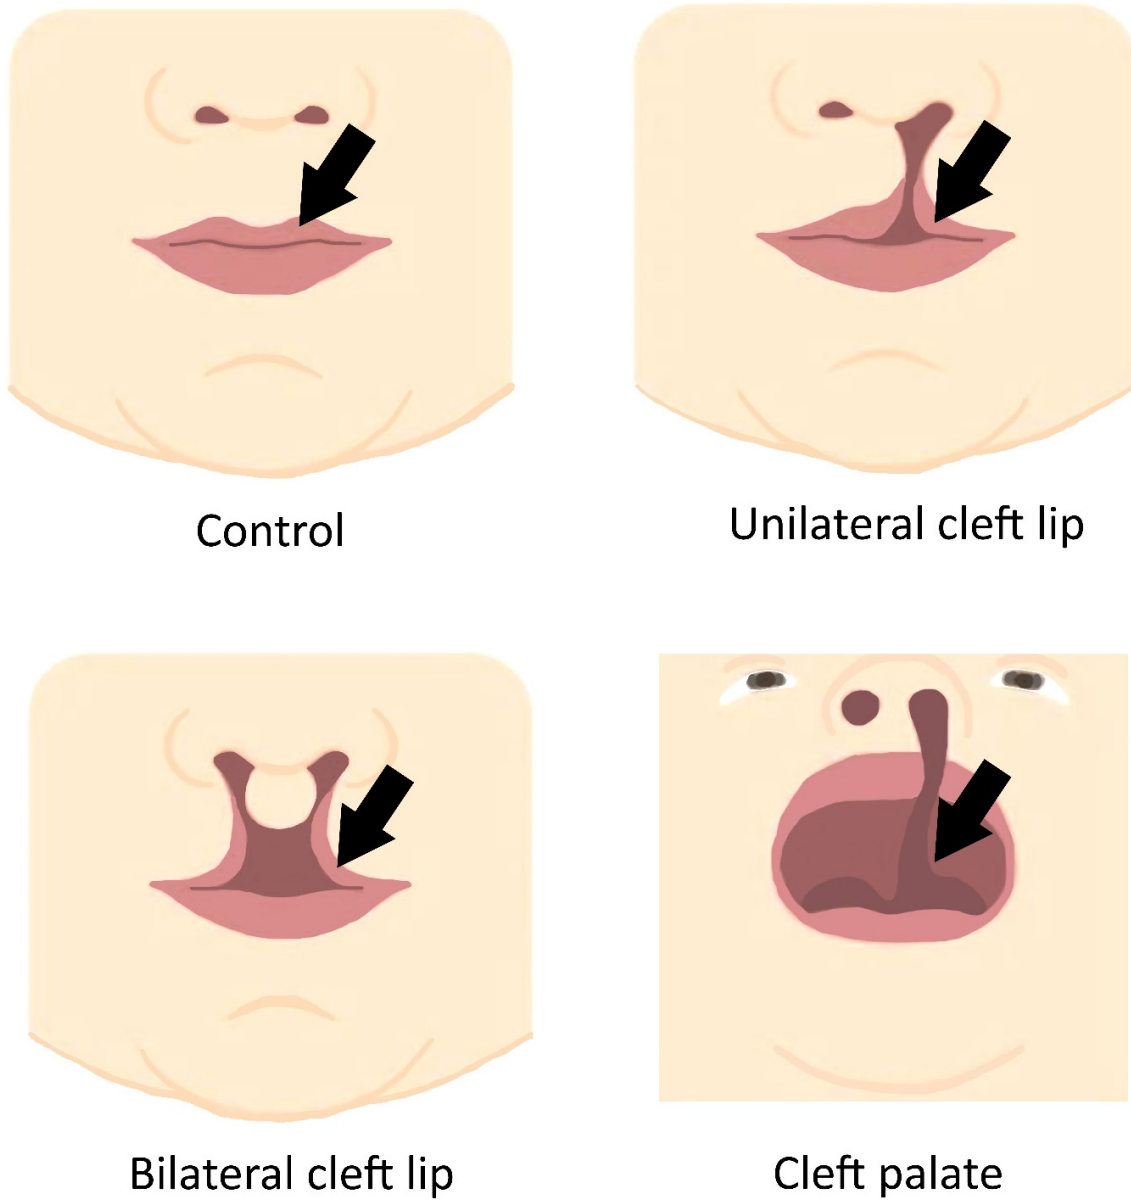

**Figure S1.** Localization of tissue used for the immunohistochemical evaluation of cleft affected tissue (arrows).

(Adapted from: <https://www.shutterstock.com/image-vector/cleft-lip-birth-defect-baby-260nw-1964613478.jpg>).
