# Supplementary material
Source: MDPI journal article supplement (https://www.mdpi.com/2304-6767/11/6/151)
Supplement: s1 [file s1]

Supplementary material 2

Figure S2. Examples of semiquantitative evaluation of SHH, SOX3, WNT3A and WNT9B immunohistochemistry of cleft affected tissue and control tissue within 5 visual fields.

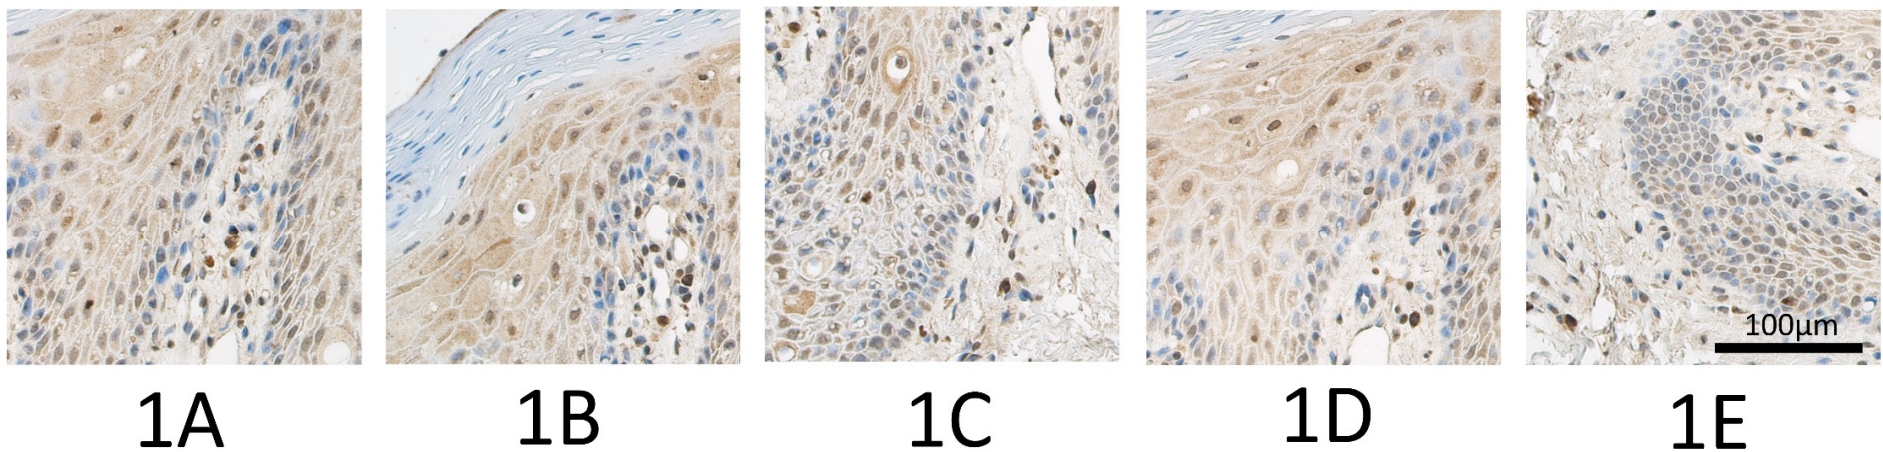

**Figure 1.** Five visual fields of Sonic Hedgehog (SHH) immunohistochemistry from a single slide of unilateral cleft lip tissue.  
(1A) Numerous (++) SHH positive epithelial cells and a moderate (++) number of SHH immunoreactive cells in connective tissue, SHH immunohistochemistry, 400x.  
(1B) A moderate (++) number of SHH positive epithelial cells and connective tissue cells, SHH immunohistochemistry, 400x.  
(1C) Moderate to numerous (++) SHH positive epithelial cells and a moderate (++) number of SHH positive cells in connective tissue, SHH immunohistochemistry, 400x.  
(1D) Moderate to numerous (++) SHH positive epithelial cells and a few to moderate (+) number of SHH positive cells in connective tissue, SHH immunohistochemistry, 400x.  
(1E) Moderate to numerous (++) SHH positive epithelial cells and a few to moderate (+) number of SHH positive connective tissue cells, SHH immunohistochemistry, 400x.

**Table 1.** Evaluation of SHH immunoreactivity from 5 visual fields within a single slide.

| Visual field | Epithelium | Connective tissue |
|--------------|------------|-------------------|
| 1A           | +++        | ++                |
| 1B           | ++         | ++                |
| 1C           | ++/+++     | ++                |
| 1D           | ++/+++     | +/++              |
| 1E           | ++/+++     | +/++              |
| Median       | ++/+++     | ++                |

Abbreviations: SHH – Sonic Hedgehog; +/+ - few to moderate number of immunoreactive cells in the visual field; ++ - moderate number of immunoreactive cells in the visual field; ++/+ - moderate to numerous immunoreactive cells in the visual field; +++ - numerous immunoreactive cells in the visual field.

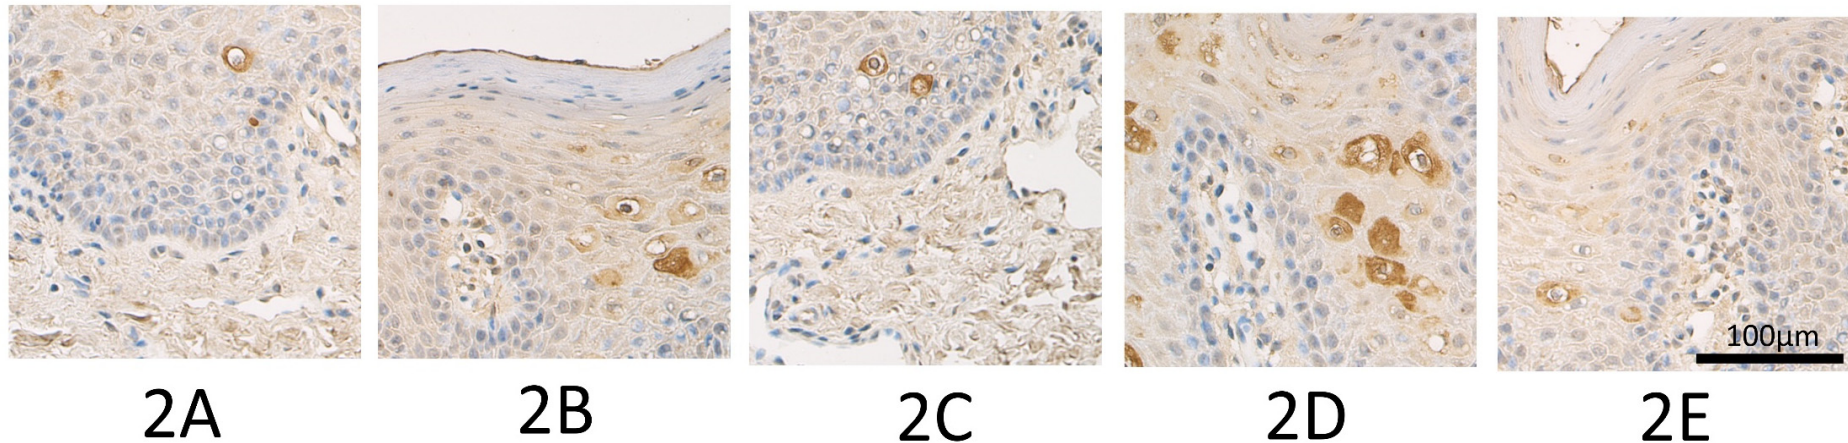

**Figure 2.** Five visual fields of SRY-box Transcription factor 3 (SOX3) immunohistochemistry from a single slide of bilateral cleft lip tissue.  
 (2A) Numerous (++) SOX3 positive epithelial cells and a few (+) SOX3 positive connective tissue cells, SOX3 immunohistochemistry, 400x.  
 (2B) Numerous (++) SOX3 positive epithelial cells and a few to moderate (+/++) SOX3 positive connective tissue cells, SOX3 immunohistochemistry, 400x.  
 (2C) Moderate to numerous (++) SOX3 positive epithelial cells and a few (+) SOX3 positive cells in connective tissue, SOX3 immunohistochemistry, 400x.  
 (2D) Moderate to numerous (++) SOX3 positive epithelial cells and a few (+) SOX3 positive cells in connective tissue, SOX3 immunohistochemistry, 400x.  
 (2E) Numerous (++) SOX3 positive epithelial cells and a few to moderate (+/++) number of SOX3 positive connective tissue cells, SOX3 immunohistochemistry, 400x.

**Table 2.** Evaluation of SOX3 immunoreactivity from 5 visual fields within a single slide.

| Visual field  | Epithelium | Connective tissue |
|---------------|------------|-------------------|
| 2A            | ++         | +                 |
| 2B            | ++         | +/++              |
| 2C            | +/++       | +                 |
| 2D            | +/++       | +                 |
| 2E            | ++         | +/++              |
| <b>Median</b> | ++         | +                 |

Abbreviations: SOX3 – SRY-box Transcription factor 3; + - a few immunoreactive cells in the visual field; +/+ - few to moderate number of immunoreactive cells in the visual field; ++ - moderate number of immunoreactive cells in the visual field; +/+ - moderate to numerous immunoreactive cells in the visual field; ++ - numerous immunoreactive cells in the visual field.



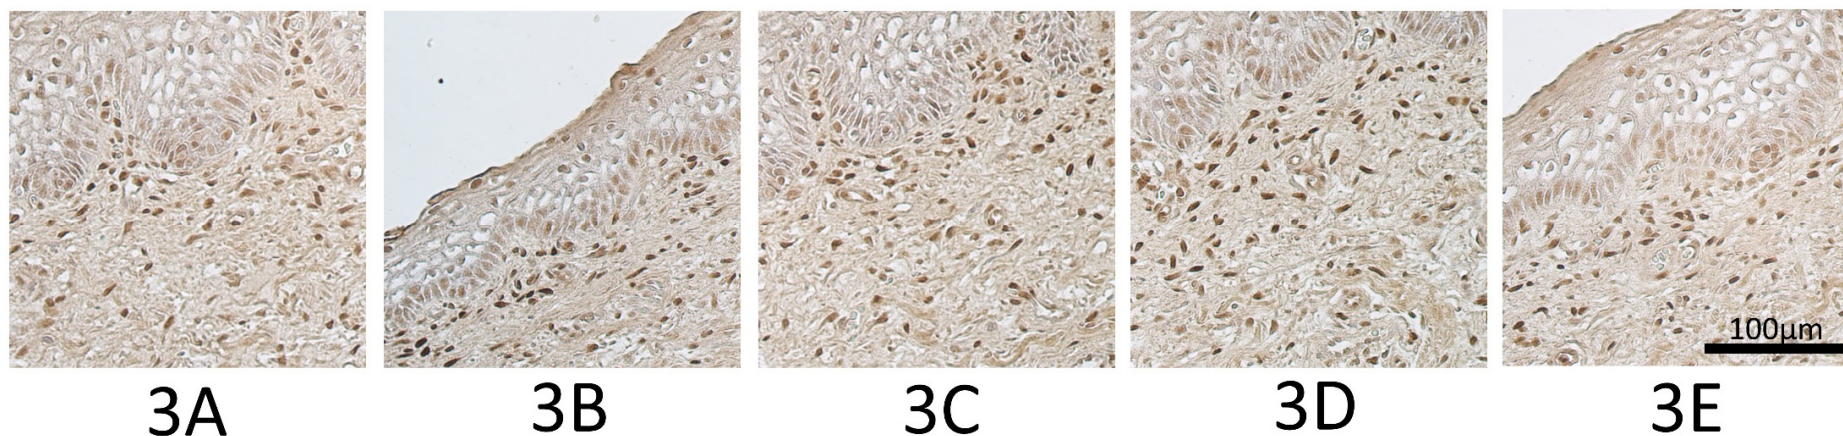

**Figure 3.** Five visual fields of WNT Family Member 3A (WNT3A) immunohistochemistry from a single slide of control tissue.

(3A) Moderate to numerous (++) WNT3A positive epithelial cells and numerous (++) WNT3A positive connective tissue cells, WNT3A immunohistochemistry, 400x.

(3B) Moderate to numerous (++) WNT3A positive epithelial cells and numerous (++) WNT3A positive connective tissue cells, WNT3A immunohistochemistry, 400x.

(3C) Moderate to numerous (++) WNT3A positive epithelial cells and numerous (++) WNT3A positive cells in connective tissue, WNT3A immunohistochemistry, 400x.

(3D) Moderate (++) number of WNT3A positive epithelial cells and numerous (++) WNT3A positive cells in connective tissue, WNT3A immunohistochemistry, 400x.

(3E) Moderate to numerous (++) WNT3A positive epithelial cells and numerous (++) WNT3A positive connective tissue cells, WNT3A immunohistochemistry, 400x.

**Table 3.** Evaluation of WNT3A immunoreactivity from 5 visual fields within a single slide.

| Visual field  | Epithelium | Connective tissue |
|---------------|------------|-------------------|
| 3A            | ++/+++     | +++               |
| 3B            | ++/+++     | +++               |
| 3C            | ++/+++     | +++               |
| 3D            | ++         | +++               |
| 3E            | ++/+++     | +++               |
| <b>Median</b> | ++/+++     | +++               |

Abbreviations: WNT3A – WNT Family Member 3A; ++ - moderate number of immunoreactive cells in the visual field; ++/+++ - moderate to numerous immunoreactive cells in the visual field; +++ - numerous immunoreactive cells in the visual field

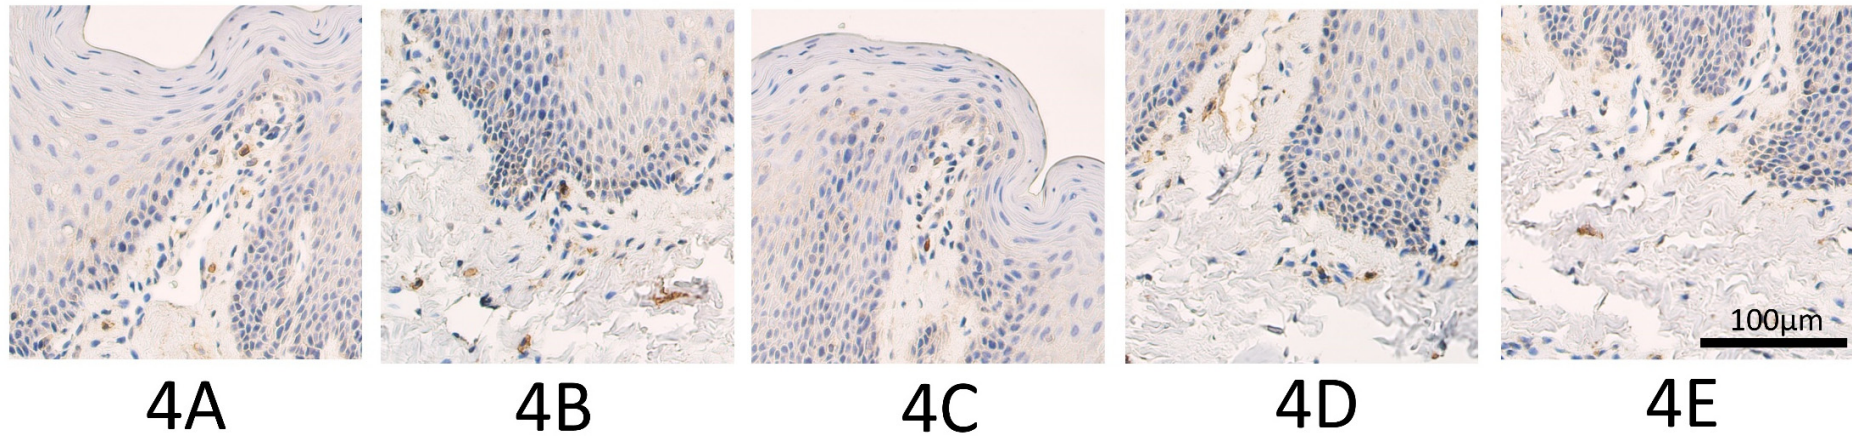

**Figure 4.** Five visual fields of WNT Family Member 9B (WNT9B) immunohistochemistry from a single slide of cleft palate tissue.

(3A) Moderate (++) number of weakly stained WNT9B positive epithelial cells and a few to moderate (+/++) number of WNT9B positive connective tissue cells, WNT9B immunohistochemistry, 400x.

(3B) Moderate to numerous (++) weakly stained WNT9B positive epithelial cells and a few to moderate (+/++) WNT9B positive connective tissue cells, WNT9B immunohistochemistry, 400x.

(3C) Moderate (++) number of WNT9B positive epithelial cells and a few (+) WNT9B positive cells in connective tissue, WNT9B immunohistochemistry, 400x.

(3D) Moderate to numerous (++) weakly stained WNT9B positive epithelial cells and a few (+) WNT9B positive cells in connective tissue, WNT9B immunohistochemistry, 400x.

(3E) Few to moderate (+/++) number of WNT9B positive epithelial cells and a few (+) WNT9B positive connective tissue cells, WNT9B immunohistochemistry, 400x.

**Table 4.** Evaluation of WNT9B immunoreactivity from 5 visual fields within a single slide.

| Visual field  | Epithelium | Connective tissue |
|---------------|------------|-------------------|
| 4A            | ++         | +/++              |
| 4B            | ++/+++     | +/++              |
| 4C            | ++         | +                 |
| 4D            | ++/+++     | +                 |
| 4E            | +/++       | +                 |
| <b>Median</b> | ++         | +                 |

Abbreviations: WNT9B – WNT Family Member 9B; + - a few immunoreactive cells in the visual field; +/+ - few to moderate number of immunoreactive cells in the visual field; ++ - moderate number of immunoreactive cells in the visual field; ++/+++ - moderate to numerous immunoreactive cells in the visual field.
